# Supplementary material for: Seasonal evolution and parameterization of Arctic sea ice bulk density: results from the MOSAiC expedition and ICESat-2/ATLAS
Source: Copernicus journal article supplement (doi:10.5194/egusphere-2024-1240), 2024-05-06
Supplement: Supplementary file 1 [file egusphere-2024-1240-supplement.pdf]

*Supplement of*

**Seasonal evolution and parameterization of Arctic sea ice bulk density: results from the MOSAiC expedition and ICESat-2/ATLAS**

Yi Zhou et al.

5 **Correspondence:** Xianwei Wang ([xianwei.wang@sjtu.edu.cn](mailto:xianwei.wang@sjtu.edu.cn)) and Ruibo Lei ([leiruibo@pric.org.cn](mailto:leiruibo@pric.org.cn))

10

15

20

25

30

35

40

**Table S1.** Overview of the 12 SIMBAs and 3 SIMBs deployed in the MOSAiC DN.

| <b>Buoy name</b> | <b>Start date</b><br>(YYYY/MM/DD) | <b>End date</b><br>(YYYY/MM/DD) | <b>Onset of growth</b><br>(YYYY/MM/DD) | <b>Initial ice thickness</b><br>(m) | <b>Initial snow depth</b><br>(m) | <b>Ice type</b> |
|------------------|-----------------------------------|---------------------------------|----------------------------------------|-------------------------------------|----------------------------------|-----------------|
| SIMBA_T47        | 2019/10/13                        | 2020/02/07                      | 2020/10/16                             | 0.34                                | 0.10                             | FYI             |
| SIMBA_T58        | 2019/10/07                        | 2020/07/21                      | 2019/11/09                             | 0.84                                | 0.08                             | SYI             |
| SIMBA_T62        | 2019/10/29                        | 2020/07/27                      | 2019/11/02                             | 0.80                                | 0.20                             | SYI             |
| SIMBA_T63        | 2019/10/07                        | 2020/07/28                      | 2019/11/28                             | 1.12                                | 0.14                             | SYI             |
| SIMBA_T64        | 2019/10/10                        | 2020/08/02                      | 2019/11/22                             | 1.74                                | 0.16                             | SYI             |
| SIMBA_T65        | 2019/10/07                        | 2020/05/30                      | 2019/12/08                             | 1.32                                | 0.14                             | SYI             |
| SIMBA_T66        | 2019/10/29                        | 2020/08/03                      | 2019/10/30                             | 0.40                                | 0.10                             | FYI             |
| SIMBA_T67        | 2019/11/09                        | 2020/08/03                      | 2019/11/14                             | 1.36                                | 0.22                             | SYI             |
| SIMBA_T68        | 2019/10/05                        | 2020/06/05                      | 2019/12/05                             | 1.81                                | 0.17                             | SYI             |
| SIMBA_T69        | 2019/10/11                        | 2020/01/31                      | 2019/10/29                             | 0.80                                | 0.08                             | SYI             |
| SIMBA_T70        | 2019/10/09                        | 2020/08/05                      | 2019/10/14                             | 0.48                                | 0.06                             | FYI             |
| SIMBA_T72        | 2019/10/09                        | 2020/04/27                      | 2019/11/02                             | 1.00                                | 0.14                             | SYI             |
| SIMB_I1          | 2019/10/05                        | 2020/03/15                      | 2019/12/17                             | 1.20                                | 0.17                             | SYI             |
| SIMB_I2          | 2019/10/07                        | 2020/07/30                      | 2019/11/10                             | 0.80                                | 0.12                             | SYI             |
| SIMB_I3          | 2019/10/10                        | 2019/02/03                      | 2019/10/10                             | 0.30                                | 0.06                             | FYI             |

**Table S2.** Growth rates of sea ice thickness for different buoys from mid-October to mid-April. Note that the statistical test *P*-values are all below 0.001.

| <b>Buoy name</b> | <b>Growth rate of sea ice thickness (m per month)</b> |
|------------------|-------------------------------------------------------|
| SIMBA_T47        | 0.23                                                  |
| SIMBA_T58        | 0.16                                                  |
| SIMBA_T62        | 0.16                                                  |
| SIMBA_T63        | 0.12                                                  |
| SIMBA_T64        | 0.10                                                  |
| SIMBA_T65        | 0.10                                                  |
| SIMBA_T66        | 0.19                                                  |
| SIMBA_T67        | 0.12                                                  |
| SIMBA_T68        | 0.08                                                  |
| SIMBA_T69        | 0.13                                                  |
| SIMBA_T70        | 0.21                                                  |
| SIMBA_T72        | 0.18                                                  |
| SIMB_I1          | 0.11                                                  |
| SIMB_I2          | 0.17                                                  |
| SIMB_I3          | 0.31                                                  |

55 **Table S3.** Fitting performance of the ice draft-to-thickness ratio to sea ice bulk density at different spatial scales and sea ice types.

| Spatial scale | Sea ice type | $R^2$ | $RMSE$ ( $\text{kg m}^{-3}$ ) | Counts         |
|---------------|--------------|-------|-------------------------------|----------------|
| 40 m          | FYI          | 0.92  | 7                             | 8538 (48.64 %) |
|               | SYI          | 0.90  | 8                             | 1061 (6.04 %)  |
|               | MYI          | 0.90  | 8                             | 7955 (45.32 %) |
| 800 m         | FYI          | 0.59  | 12                            | 1872 (80.45 %) |
|               | SYI          | 0.76  | 10                            | 80 (3.44 %)    |
|               | MYI          | 0.77  | 10                            | 375 (16.12 %)  |
| 12.5 km       | FYI          | 0.56  | 8                             | 450 (77.45 %)  |
|               | SYI          | 0.92  | 4                             | 25 (4.30 %)    |
|               | MYI          | 0.88  | 4                             | 106 (18.24 %)  |
| 25 km         | FYI          | 0.45  | 8                             | 250 (77.16 %)  |
|               | SYI          | 0.94  | 3                             | 20 (6.17 %)    |
|               | MYI          | 0.92  | 3                             | 54 (16.67 %)   |

### Text S1. Relative contribution of the input parameters

In order to quantify which input parameters used in Eq. (5) contribute most or least to the total uncertainty in sea ice bulk density,

70 the relative contribution of the input parameters ( $RC_X$ ) was defined as follows:

$$RC_X = \frac{\left(\frac{\partial \rho_i}{\partial X}\right)^2 \times \sigma_X^2}{\sigma_{\rho_i}^2} \times 100\% \quad (S1)$$

where  $\sigma_{\rho_i}$  is the uncertainty in sea ice bulk density,  $X$  and  $\sigma_X$  denote each input parameter and its uncertainty, respectively.

The partial derivatives of sea ice bulk density with respect to each variable are as follows:

$$\frac{\partial \rho_i}{\partial \rho_w} = \left(1 - \frac{h_f}{h_i} + \frac{h_s}{h_i}\right) \quad (S2)$$

$$\frac{\partial \rho_i}{\partial \rho_s} = -\frac{h_s}{h_i} \quad (S3)$$

$$\frac{\partial \rho_i}{\partial h_i} = \frac{\rho_w h_f - \rho_w h_s + \rho_s h_s}{h_i^2} \quad (S4)$$

$$\frac{\partial \rho_i}{\partial h_s} = \frac{\rho_w - \rho_s}{h_i} \quad (S5)$$

$$\frac{\partial \rho_i}{\partial h_f} = -\frac{\rho_w}{h_i} \quad (S6)$$

where  $\rho_i$  is the sea ice bulk density  $\rho_w$  and  $\rho_s$  represent the seawater and snow bulk densities, respectively;  $h_i$ ,  $h_f$ , and  $h_s$  are the sea ice thickness, total freeboard, and snow depth, respectively.

75

80
